# Supplementary material for: An Ecological Study of a Universal Employee Depression Awareness and Stigma Reduction Intervention: “Right Direction”
Source: Front Psychiatry. 2021 Aug 20;12:581876. doi: 10.3389/fpsyt.2021.581876 (PMC8417939; doi:10.3389/fpsyt.2021.581876)
Supplement: Supplementary file 1 [file Data_Sheet_1.xlsx]

## Sheet: Appendix 1
Appendix 1. Diagnosis Codes
ICD-9	ICD-9 Description
Depressive disorders
293.83	Mood disorder in conditions classified elsewhere
296.20	Major depressive affective disorder, single episode, unspecified
296.21	Major depressive affective disorder, single episode, mild
296.22	Major depressive affective disorder, single episode, moderate
296.23	Major depressive affective disorder, single episode, severe, without mention of psychotic behavior
296.24	Major depressive affective disorder, single episode, severe, specified as with psychotic behavior
296.25	Major depressive affective disorder, single episode, in partial or unspecified remission
296.26	Major depressive affective disorder, single episode, in full remission
296.30	Major depressive affective disorder, recurrent episode, unspecified
296.31	Major depressive affective disorder, recurrent episode, mild
296.32	Major depressive affective disorder, recurrent episode, moderate
296.33	Major depressive affective disorder, recurrent episode, severe, without mention of psychotic behavior
296.34	Major depressive affective disorder, recurrent episode, severe, specified as with psychotic behavior
296.35	Major depressive affective disorder, recurrent episode, in partial or unspecified remission
296.36	Major depressive affective disorder, recurrent episode, in full remission
300.4	Dysthymic disorder
311	Depressive disorder, not elsewhere classified
Anxiety disorders
293.84	Anxiety disorder in conditions classified elsewhere
300.00	Anxiety state, unspecified
300.01	Panic disorder without agoraphobia
300.02	Generalized anxiety disorder
300.09	Other anxiety states
300.10	Hysteria, unspecified
300.20	Phobia, unspecified
300.21	Agoraphobia with panic disorder
300.22	Agoraphobia without mention of panic attacks
300.23	Social phobia
300.29	Other isolated or specific phobias
300.3	Obsessive-compulsive disorders
300.5	Neurasthenia
300.89	Other somatoform disorders
300.9	Unspecified nonpsychotic mental disorder
308.0	Predominant disturbance of emotions
308.1	Predominant disturbance of consciousness
308.2	Predominant psychomotor disturbance
308.3	Other acute reactions to stress
308.4	Mixed disorders as reaction to stress
308.9	Unspecified acute reaction to stress
309.81	Posttraumatic stress disorder
313.0	Overanxious disorder specific to childhood and adolescence
313.1	Misery and unhappiness disorder specific to childhood and adolescence
313.21	Shyness disorder of childhood
313.22	Introverted disorder of childhood
313.3	Relationship problems specific to childhood and adolescence
313.82	Identity disorder of childhood or adolescence
313.83	Academic underachievement disorder of childhood or adolescence
Substance use disorders
Alcohol-related disorders
291.0	Alcohol withdrawal delirium
291.1	Alcohol-induced persisting amnestic disorder
291.2	Alcohol-induced persisting dementia
291.3	Alcohol-induced psychotic disorder with hallucinations
291.4	Idiosyncratic alcohol intoxication
291.5	Alcohol-induced psychotic disorder with delusions
291.8	Other specified alcohol-induced mental disorders
291.81	Alcohol withdrawal
291.82	Alcohol induced sleep disorders
291.89	Other alcohol-induced mental disorders
291.9	Unspecified alcohol-induced mental disorders
303.00	Acute alcoholic intoxication in alcoholism, unspecified
303.01	Acute alcoholic intoxication in alcoholism, continuous
303.02	Acute alcoholic intoxication in alcoholism, episodic
303.03	Acute alcoholic intoxication in alcoholism, in remission
303.90	Other and unspecified alcohol dependence, unspecified
303.91	Other and unspecified alcohol dependence, continuous
303.92	Other and unspecified alcohol dependence, episodic
303.93	Other and unspecified alcohol dependence, in remission
305.00	Alcohol abuse, unspecified
305.01	Alcohol abuse, continuous
305.02	Alcohol abuse, episodic
305.03	Alcohol abuse, in remission
357.5	Alcoholic polyneuropathy
425.5	Alcoholic cardiomyopathy
535.30	Alcoholic gastritis, without mention of hemorrhage
535.31	Alcoholic gastritis, with hemorrhage
571.0	Alcoholic fatty liver
571.1	Acute alcoholic hepatitis
571.2	Alcoholic cirrhosis of liver
571.3	Alcoholic liver damage, unspecified
760.71	Alcohol affecting fetus or newborn via placenta or breast milk
980.0	Toxic effect of ethyl alcohol
Substance-related disorders
292.0	Drug withdrawal
292.11	Drug-induced psychotic disorder with delusions
292.12	Drug-induced psychotic disorder with hallucinations
292.2	Pathological drug intoxication
292.81	Drug-induced delirium
292.82	Drug-induced persisting dementia
292.83	Drug-induced persisting amnestic disorder
292.84	Drug-induced mood disorder
292.85	Drug induced sleep disorders
292.89	Other specified drug-induced mental disorders
292.9	Unspecified drug-induced mental disorder
304.00	Opioid type dependence, unspecified
304.01	Opioid type dependence, continuous
304.02	Opioid type dependence, episodic
304.03	Opioid type dependence, in remission
304.10	Sedative, hypnotic or anxiolytic dependence, unspecified
304.11	Sedative, hypnotic or anxiolytic dependence, continuous
304.12	Sedative, hypnotic or anxiolytic dependence, episodic
304.13	Sedative, hypnotic or anxiolytic dependence, in remission
304.20	Cocaine dependence, unspecified
304.21	Cocaine dependence, continuous
304.22	Cocaine dependence, episodic
304.23	Cocaine dependence, in remission
304.30	Cannabis dependence, unspecified
304.31	Cannabis dependence, continuous
304.32	Cannabis dependence, episodic
304.33	Cannabis dependence, in remission
304.40	Amphetamine and other psychostimulant dependence, unspecified
304.41	Amphetamine and other psychostimulant dependence, continuous
304.42	Amphetamine and other psychostimulant dependence, episodic
304.43	Amphetamine and other psychostimulant dependence, in remission
304.50	Hallucinogen dependence, unspecified
304.51	Hallucinogen dependence, continuous
304.52	Hallucinogen dependence, episodic
304.53	Hallucinogen dependence, in remission
304.60	Other specified drug dependence, unspecified
304.61	Other specified drug dependence, continuous
304.62	Other specified drug dependence, episodic
304.63	Other specified drug dependence, in remission
304.70	Combinations of opioid type drug with any other drug dependence, unspecified
304.71	Combinations of opioid type drug with any other drug dependence, continuous
304.72	Combinations of opioid type drug with any other drug dependence, episodic
304.73	Combinations of opioid type drug with any other drug dependence, in remission
304.80	Combinations of drug dependence excluding opioid type drug, unspecified
304.81	Combinations of drug dependence excluding opioid type drug, continuous
304.82	Combinations of drug dependence excluding opioid type drug, episodic
304.83	Combinations of drug dependence excluding opioid type drug, in remission
304.90	Unspecified drug dependence, unspecified
304.91	Unspecified drug dependence, continuous
304.92	Unspecified drug dependence, episodic
304.93	Unspecified drug dependence, in remission
305.20	Cannabis abuse, unspecified
305.21	Cannabis abuse, continuous
305.22	Cannabis abuse, episodic
305.23	Cannabis abuse, in remission
305.30	Hallucinogen abuse, unspecified
305.31	Hallucinogen abuse, continuous
305.32	Hallucinogen abuse, episodic
305.33	Hallucinogen abuse, in remission
305.40	Sedative, hypnotic or anxiolytic abuse, unspecified
305.41	Sedative, hypnotic or anxiolytic abuse, continuous
305.42	Sedative, hypnotic or anxiolytic abuse, episodic
305.43	Sedative, hypnotic or anxiolytic abuse, in remission
305.50	Opioid abuse, unspecified
305.51	Opioid abuse, continuous
305.52	Opioid abuse, episodic
305.53	Opioid abuse, in remission
305.60	Cocaine abuse, unspecified
305.61	Cocaine abuse, continuous
305.62	Cocaine abuse, episodic
305.63	Cocaine abuse, in remission
305.70	Amphetamine or related acting sympathomimetic abuse, unspecified
305.71	Amphetamine or related acting sympathomimetic abuse, continuous
305.72	Amphetamine or related acting sympathomimetic abuse, episodic
305.73	Amphetamine or related acting sympathomimetic abuse, in remission
305.80	Antidepressant type abuse, unspecified
305.81	Antidepressant type abuse, continuous
305.82	Antidepressant type abuse, episodic
305.83	Antidepressant type abuse, in remission
305.90	Other, mixed, or unspecified drug abuse, unspecified
305.91	Other, mixed, or unspecified drug abuse, continuous
305.92	Other, mixed, or unspecified drug abuse, episodic
305.93	Other, mixed, or unspecified drug abuse, in remission
648.30	Drug dependence of mother, unspecified as to episode of care or not applicable
648.31	Drug dependence of mother, delivered, with or without mention of antepartum condition
648.32	Drug dependence of mother, delivered, with mention of postpartum complication
648.33	Drug dependence of mother, antepartum condition or complication
648.34	Drug dependence of mother, postpartum condition or complication
655.50	Suspected damage to fetus from drugs, affecting management of mother, unspecified as to episode of care or not applicable
655.51	Suspected damage to fetus from drugs, affecting management of mother, delivered, with or without mention of antepartum condition
655.53	Suspected damage to fetus from drugs, affecting management of mother, antepartum condition or complication
760.72	Narcotics affecting fetus or newborn via placenta or breast milk
760.73	Hallucinogenic agents affecting fetus or newborn via placenta or breast milk
760.75	Cocaine affecting fetus or newborn via placenta or breast milk
779.5	Drug withdrawal syndrome in newborn
965.00	Poisoning by opium (alkaloids), unspecified
965.01	Poisoning by heroin
965.02	Poisoning by methadone
965.09	Poisoning by other opiates and related narcotics
V65.42	Counseling on substance use and abuse
Reference: https://www.hcup-us.ahrq.gov/toolssoftware/ccs/AppendixASingleDX.txt
Note: ICD-10 codes were also used from the general equivalence mappings (GEMs).

## Sheet: Appendix 2
Appendix 2. Generic Names of Antidepressants and Anxiolytics
Generic Name
Antidepressants
Selective serotonin reuptake inhibitors (SSRI)
Citalopram
Escitalopram
Fluoxetine
Fluoxetine-olanzapine
Fluvoxamine
Paroxetine
Sertraline
Vilazodone
Serotonin and norepinephrine reuptake inhibitors (SNRI)
Desvenlafaxine
Duloxetine
Levomilnacipran
Milnacipran
Venlafaxine
Other antidepressants
Agomelatine
Amitriptyline
Amitriptyline-chlordiazepoxide
Amitriptyline-perphenazine
Amoxapine
Bupropion
Clomipramine
Desipramine
Doxepin
Imipramine
Isocarboxazid
Maprotiline
Mirtazapine
Nefazodone
Nortriptyline
Phenelzine
Protriptyline
Reboxetine
Selegiline
Tranylcypromine
Trazodone
Trimipramine
Vortioxetine
Anxiolytics
Alprazolam
Buspirone
Chlordiazepoxide
Chlormezanone
Clonazepam
Clorazepate
Diazepam
Droperidol
Halazepam
Hydroxyzine
Lorazepam
Meprobamate
Oxazepam
Prazepam
